Version dated: August 10, 2017

GHOST: INFERRING HETEROTACHOUS EVOLUTION

# GHOST: Recovering Historical Signal from Heterotachously-evolved Sequence Alignments

STEPHEN M CROTTY<sup>†\*1,2,3</sup>, BUI QUANG MINH<sup>†1</sup>, NIGEL G BEAN<sup>2,3</sup>, BARBARA R HOLLAND<sup>4</sup>, JONATHAN TUKE<sup>2,3</sup>, LARS S JERMIIN<sup>5,6</sup>, ARNDT VON HAESELER<sup>1,7</sup>

<sup>1</sup>*Center for Integrative Bioinformatics Vienna, Max F. Perutz Laboratories, University of Vienna and Medical University of Vienna, Vienna, Austria*

<sup>2</sup>*School of Mathematical Sciences, University of Adelaide, Adelaide, SA 5005, Australia.*

<sup>3</sup>*ARC Centre of Excellence for Mathematical and Statistical Frontiers, The University of Adelaide, Adelaide, SA, Australia.*

<sup>4</sup>*School of Physical Sciences, University of Tasmania, Hobart, TAS 7001, Australia.*

<sup>5</sup>*CSIRO Land & Water, Black Mountain Laboratories, Canberra, ACT 2601, Australia.*

<sup>6</sup>*Research School of Biology, Australian National University, Canberra, ACT 2601, Australia*

<sup>7</sup>*Bioinformatics & Computational Biology, Faculty of Computer Science, University of Vienna, Vienna, Austria.*

19 † Joint first authors (these authors contributed equally to the work)

20 \*Corresponding author: Stephen Crotty, Center for Integrative Bioinformatics

21 Vienna, Max F. Perutz Laboratories, University of Vienna and Medical University

22 of Vienna, Vienna, Austria; E-mail: [stephen.crotty@univie.ac.at](mailto:stephen.crotty@univie.ac.at)

23 *Abstract.*— Molecular sequence data that have evolved under the influence of  
24 heterotachous evolutionary processes are known to mislead phylogenetic inference.  
25 We introduce the General Heterogeneous evolution On a Single Topology (GHOST)  
26 model of sequence evolution, implemented under a maximum-likelihood framework  
27 in the phylogenetic program IQ-TREE. Extensive simulations show that the  
28 GHOST model can accurately recover the tree topology, branch lengths,  
29 substitution rate and base frequency parameters from heterotachously-evolved  
30 sequences. We apply our model to an electric fish dataset and identify a subtle  
31 component of the historical signal, linked to the previously established convergent  
32 evolution of the electric organ in two geographically distinct lineages of electric fish.  
33 We compare the GHOST model to the partition model and show that, owing to the  
34 minimization of model constraints, the GHOST model is able to offer unique  
35 biological insights when applied to empirical data.

36       Keywords: Phylogenetics, heterotachy, mixture model, maximum likelihood,  
37 convergent evolution

38           The success and reliability of model-based phylogenetic inference methods  
39 are limited by the adequacy of the models that are assumed to approximate the  
40 evolutionary process. Homogeneous evolutionary models have long been recognised  
41 as inadequate since the rate of evolution is known to vary across sites (Fitch and  
42 Margoliash, 1967; Holmquist et al., 1983) and across lineages (Baele et al., 2006;  
43 Lopez et al., 2002; Wu and Susko, 2011; Jayaswal et al., 2014). There are many  
44 models that have been proposed to compensate for rate heterogeneity across sites.  
45 The classical example is the discrete  $\Gamma$  model (Yang, 1994), which allows different  
46 classes of variable sites to have their rates drawn from a  $\Gamma$  distribution. More  
47 recently, Kalyaanamoorthy et al. (2017) relaxed the requirement for the rates of the  
48 classes to fit a  $\Gamma$  distribution, implementing a probability distribution-free  
49 rates-across-sites model. However, these models still assume that the substitution  
50 rate for each site is constant across all lineages. This is too restrictive; biologically  
51 speaking it is not hard to accept that evolutionary processes can be both lineage  
52 and time dependent. In the context of a phylogenetic tree this manifests as  
53 lineage-specific shifts in evolutionary rate, coined heterotachy (Philippe and Lopez,  
54 2001; Lopez et al., 2002), resulting in sequences that cannot be characterised as  
55 having evolved according to a single set of branch lengths and substitution  
56 model.

57           The effect of heterotachy on phylogenetic inference was thrust into the  
58 spotlight by Kolaczkowski and Thornton (K&T) (2004). They used a simulation  
59 study to show that heterotachously-evolved sequences could mislead the popular  
60 inference methods of maximum-likelihood (ML) and Bayesian Markov Chain  
61 Monte-Carlo (BMCMC) to a greater extent than maximum parsimony (MP). Their  
62 findings were controversial and were widely challenged on the grounds that the  
63 simulations captured only a special case of heterotachy (Gadagkar and Kumar,  
64 2005; Philippe et al., 2005; Spencer et al., 2005; Steel, 2005), and more general  
65 studies of heterotachy concluded that ML performed at least as well as, and in  
66 most cases better than, MP (Gadagkar and Kumar, 2005; Spencer et al., 2005).  
67 Valid as these criticisms may have been, the key issue that K&T's study brought to  
68 light stood firm - heterotachy was a primary source of model misspecification and  
69 the models and methods of the time were ill-equipped to deal with it. The main  
70 impediment to the development of models that can accommodate  
71 heterotachously-evolved sequences has been the computational expense. Models  
72 that account for heterogeneity of rates of change across sites can be integrated  
73 relatively cheaply, but modeling heterotachy is not so simple. One approach has  
74 been to use partition models (Lanfear et al., 2012), which require the data to be  
75 partitioned *a priori*. The analysis then proceeds by inferring separate branch length

76 and model parameters for each partition. Sequence data is commonly partitioned  
77 based on genes and/or codon position. However, the inherent assumption of such a  
78 partitioning scheme is that heterotachy only occurs between partitions, not within  
79 each partition. This may not be a valid assumption, so the requirement to partition  
80 the data in advance of the analysis is a possible source of model misspecification.  
81 Another approach has been to use mixture models, in which the likelihood of the  
82 data at each site in the alignment is calculated as a weighted sum across multiple  
83 classes (see Pagel and Meade (2005) for a detailed description of phylogenetic  
84 mixture models). The most common approaches can be referred to as mixed  
85 substitution rate (MSR) models (Lartillot and Philippe, 2004; Pagel and Meade,  
86 2004), whereby each class has its own substitution rate matrix; and mixed branch  
87 length (MBL) models (Kolaczkowski and Thornton, 2004; Meade and Pagel, 2008),  
88 whereby each class has its own set of branch lengths on the tree. As a consequence  
89 of their parameter rich nature, these models have all been implemented only within  
90 a Bayesian framework. Wu and Susko (2009) proposed a general framework for  
91 heterotachy, encompassing both mixed substitution rate and mixed branch length  
92 models as special cases. Another example is the CAT models of Lartillot and  
93 Philippe (2004), which have been widely used (Whelan and Halanaych (2017) and  
94 references therein). Whelan and Halanaych (2017) carried out extensive simulation

95 and empirical studies comparing the performance of the CAT models to partition  
96 models. They concluded that despite their additional complexity and associated  
97 increase in runtime, the CAT models generally perform no better than partition  
98 models. They also found that when new mixture models are introduced in the  
99 literature their performance is not always assessed against the current popular  
100 methods for phylogenetic analysis, such as partition models.

101         As a consequence of their varied nature, mixture models require many  
102 parameters and the associated computational expense has thus far impeded their  
103 implementation in a ML framework. The issue of computational expense is an ever  
104 diminishing one; as computing power increases and algorithmic architecture  
105 improves, the opportunity to employ more and more complex models of sequence  
106 evolution does also. We introduce the General Heterogeneous evolution On a Single  
107 Topology (GHOST) model for ML inference. The GHOST model combines features  
108 of both MSR and MBL models. It consists of a number of classes, all evolving on  
109 the same tree topology. For each class the branch lengths, nucleotide or amino-acid  
110 frequencies, substitution rates and class weight are parameters to be inferred. It  
111 minimises the number of assumptions that must be made *a priori* by inferring all  
112 parameters directly from the data. Therefore, GHOST is free of the artificial  
113 constraints common in other models, often included for computational expedience

114 rather than biological relevance. This means that the GHOST model has the  
115 necessary freedom to extract any historical signals present in the data. We provide  
116 an easy to use implementation of the GHOST model in the phylogenetic program  
117 IQ-TREE (Nguyen et al., 2015), the first mixture model of comparable flexibility to  
118 be made available in a ML framework.

## 119 METHODS AND MATERIALS

### 120 *Model Description*

121 The GHOST model consists of  $m$  classes and one tree topology,  $T$ , common to all  
122 classes. All other parameters are inferred separately for each class. For the  $j^{\text{th}}$  class  
123 we define  $\lambda_j$  as the set of branch lengths on  $T$ ;  $\mathbf{R}_j$ , the relative substitution rate  
124 parameters;  $\mathbf{F}_j$ , the set of nucleotide or amino acid frequencies; and  $w_j$ , the class  
125 weight ( $w_j > 0, \sum w_j = 1$ ). Given a multiple sequence alignment (MSA),  $A$ , we  
126 define  $L_{ij}$  as the likelihood of the data observed at the  $i^{\text{th}}$  site in  $A$  under the  $j^{\text{th}}$   
127 class of the GHOST model.  $L_{ij}$  is computed using Felsenstein's pruning algorithm  
128 (Felsenstein, 1981). The likelihood of the  $i^{\text{th}}$  site,  $L_i$ , is then given by the weighted  
129 sum of the  $L_{ij}$  over all  $j$ :



$$L_i = \sum_{j=1}^m w_j L_{ij}(T, \lambda_j, \mathbf{R}_j, \mathbf{F}_j).$$

130 Therefore, if  $S$  contains  $N$  sites (length of the alignment), the full  
131 log-likelihood,  $\ell$ , is given by:

$$\ell = \sum_{i=1}^N \log \left( \sum_{j=1}^m w_j L_{ij}(T, \lambda_j, \mathbf{R}_j, \mathbf{F}_j) \right).$$

132 We make use of the existing parameter optimisation algorithms within  
133 IQ-TREE, extending it where necessary, to incorporate parameter estimation  
134 across the  $m$  classes.

### 135 *Model Parameter Estimation for a Fixed Tree, $T$*

136 Let  $\Theta = \{w_1, \dots, w_m, \lambda_1, \dots, \lambda_m, \mathbf{R}_1, \dots, \mathbf{R}_m, \mathbf{F}_1, \dots, \mathbf{F}_m\}$  denote the GHOST  
137 model parameters (*i.e.*, class weights, branch lengths, relative substitution rates,  
138 and nucleotide or amino-acid frequencies) for each of the  $m$  classes. To estimate all  
139 parameters for a tree  $T$  we employ an expectation-maximization (EM) algorithm

140 (Dempster et al., 1977; Wang et al., 2008). We initialize  $\Theta$  with all  $\hat{\mathbf{R}}_j = \mathbf{1}$  in each  
141 class, uniform nucleotide or amino-acid frequencies  $\hat{\mathbf{F}}_j$  (i.e., the Jukes-Cantor  
142 model), and  $\hat{w}_j$  and  $\hat{\lambda}_j$  obtained by parsimonious branch lengths rescaled by a  
143 discrete, distribution-free rates-across-sites model (Kalyaanamoorthy et al., 2017)  
144 with  $m$  categories. This becomes the current estimate  $\hat{\Theta}$ . The EM algorithm  
145 iteratively performs an expectation (E) step and a maximization (M) step to  
146 update the current estimate until a (local) maximum likelihood is reached.

147 *E-step.*— For each site  $i$  and class  $j$  compute the posterior probability  $\hat{p}_{ij}$  of site  $i$   
148 belonging to class  $j$  based on the current estimate  $\hat{\Theta}$ :

$$\hat{p}_{ij} = \frac{\hat{w}_j L_{ij}(T, \hat{\lambda}_j, \hat{\mathbf{R}}_j, \hat{\mathbf{F}}_j)}{\sum_{k=1}^m \hat{w}_k L_{ik}(T, \hat{\lambda}_k, \hat{\mathbf{R}}_k, \hat{\mathbf{F}}_k)}.$$

149 *M-step.*— For each class  $j$ , maximize the log-likelihood function:

$$\ell_j = \sum_{i=1}^N \hat{p}_{ij} \log \left( L_{ij}(T, \lambda_j, \mathbf{R}_j, \mathbf{F}_j) \right)$$

150 to obtain the next  $\hat{\lambda}_j^{NEW}$ ,  $\hat{R}_j^{NEW}$ ,  $\hat{F}_j^{NEW}$ . This can be done with standard  
151 phylogenetic optimization routines for each class.

152 Finally, the weights are updated by:

$$\hat{w}_j^{NEW} = \frac{1}{N} \sum_{i=1}^N \hat{p}_{ij}.$$

153 That is, the new weight for class  $j$  is the mean posterior probability of each  
154 site belonging to class  $j$ . This completes the proposal of the new estimate  $\hat{\Theta}^{NEW}$ .  
155 If  $\ell(\hat{\Theta}^{NEW}) > \ell(\hat{\Theta}) + \epsilon$  (where  $\epsilon$  is a user-defined tolerance,  $\epsilon = 0.01$  by default),  
156 then  $\hat{\Theta}$  is replaced by  $\hat{\Theta}^{NEW}$  and the E and M steps are repeated. Otherwise, the  
157 EM algorithm finishes.

158 An auxiliary benefit of the ML implementation of the GHOST model in  
159 IQ-TREE is that once the EM-algorithm has converged, we can soft-classify sites  
160 according to their probability of belonging to a particular class. Post convergence,  
161 the final values of  $p_{ij}$  can be directly interpreted as the probability that the  $i^{th}$  site  
162 in the alignment belongs to the  $j^{th}$  class. This classification can be used to identify  
163 sites in the alignment that belong with high probability to a particular class of  
164 interest.

## Software

165

166 The GHOST model has been implemented in IQ-TREE (Nguyen et al., 2015)  
167 (<http://www.iqtree.org>), the first model of this type and complexity to be made  
168 available in a ML framework. The GHOST model can be run with both nucleotide  
169 and amino acid sequences. The GHOST model is executed in IQ-TREE v1.6 by  
170 augmenting the model argument as shown below. For example if one wants to fit a  
171 four-class GHOST model in conjunction with the GTR model of evolution to  
172 sequences contained in `data.fst`, one would use the following command:

```
173     iqtree -s data.fst -m GTR+H4
```

174 By default the above command will infer only one set of equilibrium base  
175 frequencies and apply these to all classes. To infer separate equilibrium base  
176 frequencies for each class then we must add the `+FO` option:

```
177     iqtree -s data.fst -m GTR+FO+H4
```

178 The above command implements the linked version of the GHOST model.  
179 This means that only one set of GTR rate parameters will be inferred and applied  
180 to all classes. If one wishes to infer separate GTR rate parameters for each class  
181 then the unlinked version is required:

```
182     iqtree -s data.fst -m GTR+FO*H4
```



201 carried out by K&T.

202 *12-taxon simulations.*— The replication of the K&T simulations focused on  
203 recovering tree topology only. However, the GHOST model is parameter rich and  
204 naturally the validation process must address its ability to accurately recover  
205 branch lengths and model parameters. We constructed independent sets of  
206 parameters for two classes on a randomly generated 12-taxon tree using the GTR  
207 model of evolution. For each class the branch lengths were drawn randomly from an  
208 exponential distribution with a mean of 0.1. When specifying a GTR rate matrix  
209 in *Seq-Gen*, the G $\leftrightarrow$ T substitution rate is fixed at 1 and all other substitution rates  
210 are expressed relatively. Within each class, the five relative substitution rates were  
211 drawn randomly from a uniform distribution between 0.5 and 5. The four base  
212 frequencies for each class were assigned a minimum of 0.1, with the remainder  
213 allocated proportionally by scaling a normalised set of four observations from a  
214 uniform distribution. From these two classes MSAs were constructed (again using  
215 *Seq-Gen*) by varying the weight of each class. The weight of Class 1,  $w_1$ , was varied  
216 from 0.2 to 0.8 in increments of 0.05 and at each increment 20 separate MSAs were  
217 simulated. Each MSA was constructed by concatenating two independently  
218 simulated sets of sequences, the first of length  $10000 \times w_1$  simulated using the Class  
219 1 parameters, and the second of length  $10000 \times (1 - w_1)$  simulated using the Class

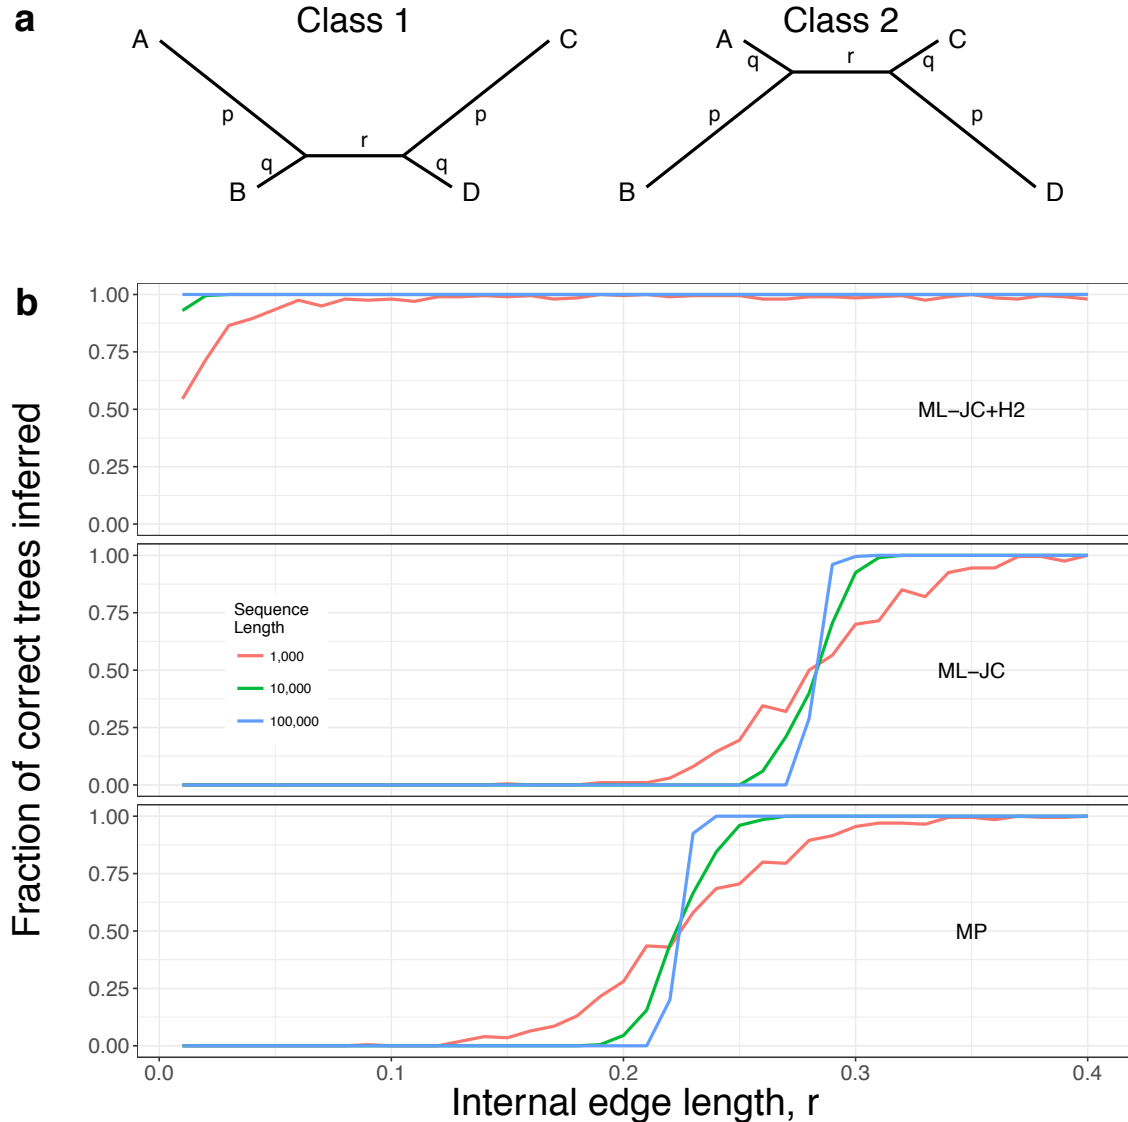

Figure 1: Replication of the simulations of Kolaczkowski & Thornton. (a) We simulated DNA sequences on two symmetric, 4-taxon trees of identical topology using the Jukes-Cantor (JC) model of evolution (Jukes and Cantor, 1969). The branch lengths were constructed such that each tree comprised of two non-sister long branches and two non-sister short branches. Thus each tree was susceptible to long branch attraction (Felsenstein, 1978) (LBA). Importantly, the LBA artefact in both trees was complementary - the bias was in the direction of the AC|BD tree. (b) Performance of maximum likelihood (ML) using a JC, two-class mixture model (ML-JC+H2), ML using a single-class JC model (ML-JC) and maximum parsimony (MP) for data generated under strong heterotachy,  $p=0.75$  and  $q=0.05$ . The length of the internal branch,  $r$ , was varied between 0.01 and 0.4 with 200 replicates at each value of  $r$ . ML-JC+H2 was able to reliably recover the tree topology for this data even when the internal branch is very short.

220 2 parameters. We used IQ-TREE to infer parameters from each MSA under a  
221 GHOST model with two GTR classes (GTR+FO\*H2). We also inferred parameters  
222 from each MSA under a GTR edge-unlinked partition model.

223 *Parameter recovery: metrics.*— The recovery accuracy of base frequency and  
224 relative rate parameters for the 12-taxon simulations was measured by calculating  
225 the mean absolute difference between the inferred and true parameters. The  
226 accuracy of branch length estimates was assessed using the branch score metric, BS  
227 (Kuhner and Felsenstein, 1994). One challenge in assessing accuracy of branch  
228 length recovery is that BS is an absolute distance metric. Therefore, we established  
229 a frame of reference so that we could assess whether the results obtained are  
230 suitably close to the truth or not. To do this we made use of the estimates under  
231 the edge-unlinked partition model as a baseline. The fundamental difference  
232 between the partition model and the GHOST model is that the partition model has  
233 *a priori* knowledge of which sites in the alignment belong to which class. This  
234 means that in effect (and excluding the possibility of inferring the incorrect  
235 topology) the results of the partition model are identical to those that would be  
236 obtained by fitting GTR models to the Class 1 and Class 2 sequences  
237 independently. Thus we can consider the accuracy of the partition model as a  
238 benchmark.



239 *Convergent Evolution of the  $Na_v1.4a$  Gene Among Teleosts*

240 To investigate the performance of the GHOST model using real data we applied it  
241 to a sequence alignment (2178 bp) taken from the coding region of a sodium channel  
242 gene,  $Na_v1.4a$ , for 11 teleost species. We used Akaike's Information Criterion (AIC)  
243 (Akaike, 1974) to determine the model of sequence evolution and number of classes  
244 that provided the best fit to the data. We also used PartitionFinder (Lanfear et al.,  
245 2012) and IQ-TREE to fit the best edge-unlinked partition model to the alignment.  
246 The data was partitioned based on codon position.

247 **RESULTS & DISCUSSION**

248 *Validation -  $K&T$  Simulations*

249 *Experiment 1.*— We fixed  $p = 0.75$  and  $q = 0.05$  (see Fig. 1a) and varied the  
250 internal branch length,  $r$ , on the interval  $[0.01, 0.4]$  in increments of 0.01. For each  
251 value of  $r$ , 200 simulated MSAs were constructed by concatenating two  
252 sub-alignments of equal length, one simulated on each of the trees in Figure 1a. We  
253 carried out phylogenetic inference on each MSA using MP, ML-JC and  
254 ML-JC+H2. The experiment was repeated for sequence lengths of 1,000, 10,000  
255 and 100,000 base pairs. The results are shown in Figure 1b. We found that both

256 ML-JC and MP were misled when  $r$  was short, but as  $r$  increased MP recovered  
257 before ML. For a sequence length of 100kb, MP was misled to some extent for  
258  $r < 0.24$  and ML-JC was misled for  $r < 0.3$ . These findings mirrored those of K&T  
259 precisely. However, the ML-JC+H2 model however was never misled. Figure 1b  
260 shows that given sufficient sequence length, the ML-JC+H2 model inferred the  
261 correct topology from the heterogeneous sequences 100% of the time with  $r$  as low  
262 as 0.01. Our results clearly demonstrate that the ML-JC+H2 model can correctly  
263 infer the tree topology when ML-JC and MP both are misled by the heterotachous  
264 nature of the data.

265 *Experiment 2.*— We tested nine different combinations of  $p \in \{0.3, 0.5, 0.7\}$  and  
266  $q \in \{0.001, 0.1, 0.2, 0.3, 0.4\}$  (see Fig. 1a). For each of the three methods/models  
267 (MP, ML-JC and ML-JC+H2) and at each combination of  $p$  and  $q$  we determined  
268 the smallest value of  $r$  (subject to the minimum  $r = 0.001$ ), denoted  $BL_{50}$  by K&T,  
269 such that the correct topology was returned at least 50% of the time. The results  
270 (Fig. 2) indicate that ML-JC+H2 comprehensively outperformed the two  
271 alternatives, with the difference most apparent when the influence of heterotachy  
272 was strongest (most notably when  $p$  is large and  $q$  is small). Again the results we  
273 observed for MP and ML-JC closely emulated the findings of K&T.

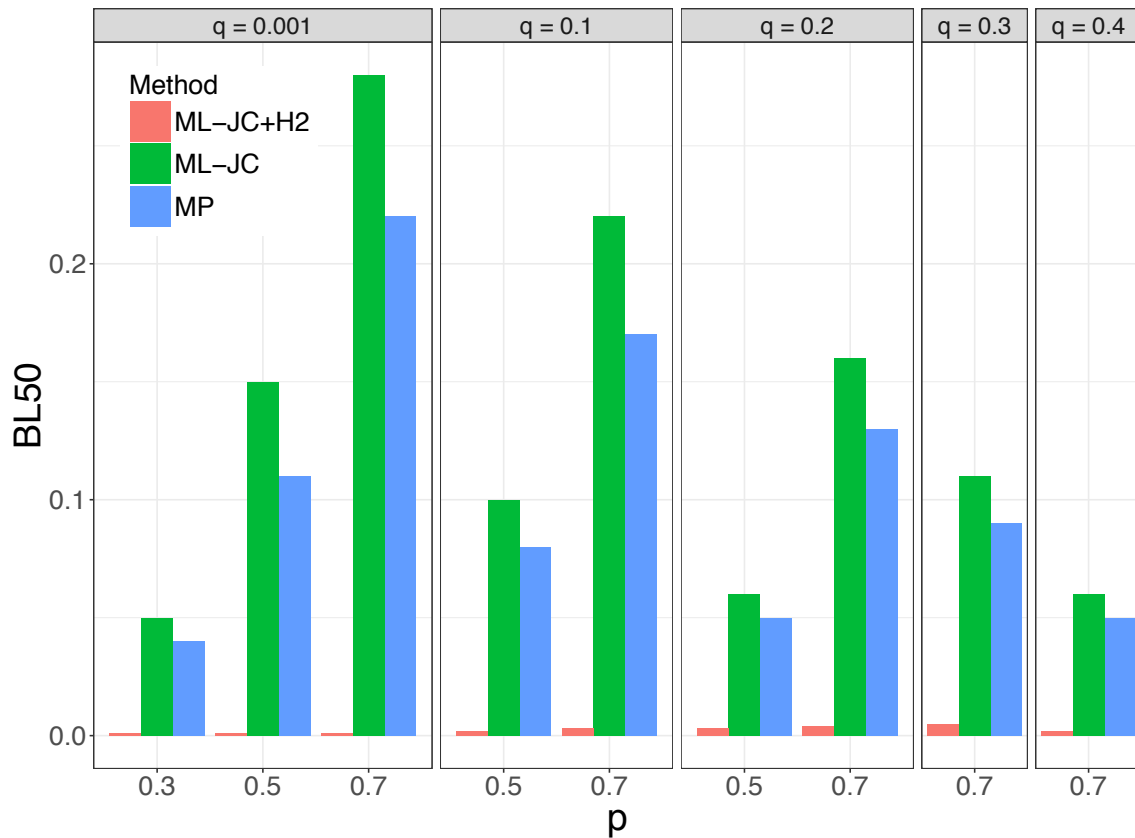

Figure 2: The ML-JC+H2 model clearly outperforms MP and ML-JC over the range of heterotachous conditions tested by K&T. They introduced the  $BL_{50}$  measure as the minimum internal branch length required for the method to recover the correct tree topology at least 50% of the time. Small values of  $BL_{50}$  indicate that the model is less likely to be misled by the heterotachous nature of the data.

274 *Experiment 3.*— We tested the impact of varying the weight,  $w$ , of each class in the  
275 simulated MSAs for a variety of branch length combinations. Initially  $p$  and  $q$  (see  
276 Fig. 1a) were fixed at 0.75 and 0.05 respectively, with  $r \in \{0.05, 0.15, 0.25\}$  and  
277  $w \in \{0.01, 0.1, 0.2, 0.3, 0.4, 0.5, 0.6, 0.7, 0.8, 0.9, 0.99\}$ . The process was then  
278 repeated, this time with  $p$  and  $r$  fixed at 0.75 and 0.15 respectively, with  
279  $q \in \{0.05, 0.15, 0.25\}$  and  $w$  as before. Sequence length was held fixed throughout  
280 at 100,000bp and 200 replicates were simulated at each combination of branch  
281 lengths and weight. We found that for almost all branch length combinations  
282 ML-JC+H2 was able to recover the correct topology for all replicates. In the entire  
283 experiment, only one dataset (out of 13,200) returned the incorrect topology. The  
284 results of K&T indicate that ML-JC could not reliably recover the correct topology  
285 for all weights for any of the branch length combinations.

286         The good performance of the GHOST model over the three K&T  
287 experiments should be expected in some sense, as ML-JC+H2 enjoys significant  
288 advantage over the two alternatives. It is in no way misspecified, having the  
289 freedom to fit two classes evolved under the JC substitution model, precisely the  
290 conditions used to simulate the data. Conversely, ML-JC has only a single class  
291 and therefore is subject to model misspecification. No single set of branch lengths  
292 can reproduce the signal present in the simulated alignments. MP is obviously not

293 subject to model misspecification as the method is non-parametric, but it is subject  
294 to the long-established artefact of long branch attraction (LBA) (Felsenstein, 1978).  
295 Felsenstein showed that having long non-sister branches separated by a relatively  
296 short internal branch can result in MP incorrectly inferring the long branches as  
297 sisters. Figure 1a shows the two trees used for the classes in the mixture, both  
298 sharing the same AB|CD topology. The Class 1 tree has long terminal branches on  
299 the A and C lineages, therefore the LBA artefact leads MP to incorrectly favour  
300 the AC|BD topology. The Class 2 tree is in a sense the symmetric opposite of the  
301 Class 1 tree, it has long terminal edges on the B and D lineages so the result is the  
302 same: LBA leads MP to incorrectly infer the AC|BD topology.

303 Therefore the successful replication of the K&T simulations is a necessary  
304 but not sufficient condition for the GHOST model's endorsement. It indicates that  
305 the implementation of the GHOST model within IQ-TREE's algorithm structure  
306 has been successful, but these simulations are on only four taxa and use the most  
307 simple model of sequence evolution. Moreover, they only focus on recovering  
308 correct tree topology and not inferring branch length parameters.

309 *12-taxon simulations.*— We simulated heterotachously-evolved MSAs on a random  
310 12-taxon tree topology under a GTR+FO\*H2 model. Using the true GTR+FO\*H2

311 model, IQ-TREE accurately recovered the correct tree topology in all 260  
312 simulated datasets. Figure 3 shows the performance of the GHOST model in  
313 recovering the various tree and model parameters for Class 1 of the simulated data.  
314 The analogous plots for Class 2 can be found in Supplementary Figures S1 - S4.  
315 The results of the 12-taxon simulations clearly show that under the GTR+FO\*H2  
316 model IQ-TREE recovered the base frequencies, relative rate parameters and  
317 weights to a high degree of accuracy for both classes. With respect to the branch  
318 score (BS) (Figs. 3c and S3), we see that the GHOST model again performs very  
319 well. The mean BS for the GHOST model approaches that obtained by the  
320 partition model as class weight (and therefore share of sequence length in the  
321 mixture) increases. This is a very impressive result, given that the partition model  
322 enjoys the significant advantage of having full knowledge of which sites were  
323 simulated under which class. A BS of zero would imply that the true simulation  
324 parameters were inferred for every simulated alignment. Thus, the magnitude of  
325 the BS for the partition model can be thought of as a measure of the stochastic  
326 simulation error. The difference between the BS for the GHOST and partition  
327 models can then be considered the error attributable to losing the knowledge of the  
328 partitioning scheme. Clearly this error is negligible in comparison to the simulation  
329 error. In Figure 3c, when  $w_1 > 0.5$  (or equivalently Fig. S3 when  $w_1 < 0.5$ ), the

330 clear overlap of the error bars (which represent  $\pm 2$  standard errors of the mean)  
331 suggests that the trees inferred by the GHOST model are not significantly different  
332 from those inferred by the partition model. This is a promising result, as in  
333 empirical data any partitioning of the MSA is based on assumptions, and therefore  
334 introduces a significant potential source of model misspecification. The GHOST  
335 model can be applied without any such assumptions.

336         To demonstrate the ability of the GHOST model to provide meaningful  
337 information about which sites might belong to which class, we performed a soft  
338 classification on one of the MSAs generated for the 12-taxon simulations. For  
339 simplicity we have chosen an MSA where Class 1 and Class 2 are of equal weight.  
340 Figure 4 clearly indicates, as one would expect, that the probability of a site  
341 belonging to Class 1 is generally higher for those sites that were simulated under  
342 the Class 1 parameters. However, given the stochastic element of the simulations,  
343 there are some sites simulated under the Class 2 parameters that are classified as  
344 having a higher probability of evolving under Class 1, and *vice versa*. For this  
345 reason we never attempt to hard classify specific sites to a particular class. Rather  
346 we consider a specific site's probability distribution of evolving under all of the  
347 classes.

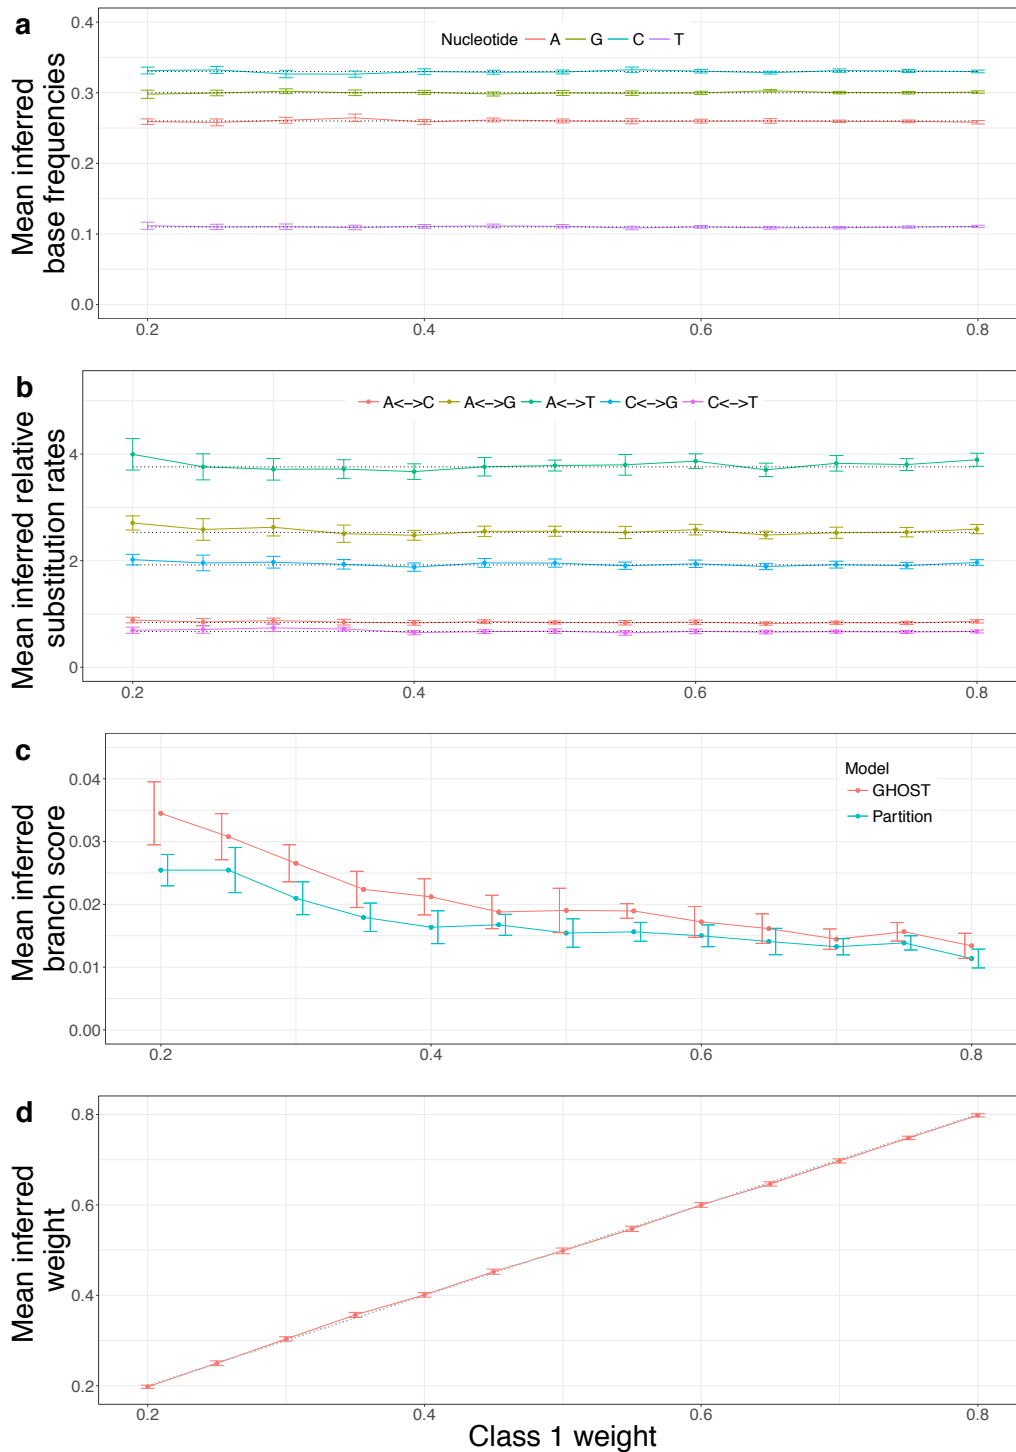

Figure 3: 12-taxon simulations - Class 1 inferred parameters vs Class 1 weight. The data points indicate the mean value of the inferred parameter or statistic, the error bars represent  $\pm 2$  standard errors of the mean. Dotted lines represent the true parameter value used for data simulation. (a) Base frequencies (b) Relative substitution rates (c) Branch score (BS) for both the GHOST and partition models (d) Inferred Class 1 weight.



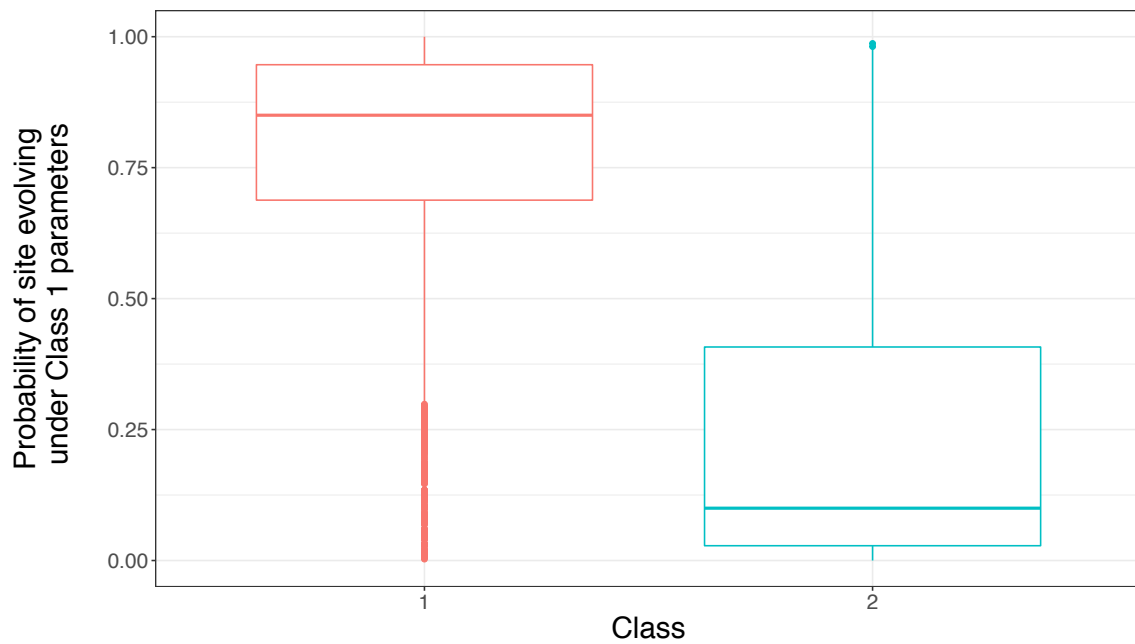

Figure 4: Soft classification of sites to classes - the probability of a site belonging to Class 1 is shown on the y-axis, the two Classes are shown on the x-axis. The boxplots clearly show that in general, sites generated under Class 1 parameters tend to have a higher probability of belonging to Class 1 than sites generated under Class 2.

348 *Convergent Evolution of the  $Na_v1.4a$  Gene Among Teleosts*

349 To investigate the performance of the GHOST model using empirical data we  
350 applied it to the coding region of a sodium channel gene,  $Na_v1.4a$ , for 11 teleost  
351 species. Zakon et al. (2006) demonstrated the role of this gene in the convergent  
352 evolution of the electric organ amongst electric fish species from South America  
353 and Africa. AIC determined that GTR+FO\*H4 provided the best fit between tree,  
354 model and data (Supplementary Fig. S5). The trees inferred by the GHOST model  
355 can be found in Figure 5. We then partitioned the electric fish sequence alignment  
356 into three partitions, based on codon position (CP). PartitionFinder suggested  
357 GTR+FO+G4 (GTR with inferred equilibrium base frequencies plus discrete  $\Gamma$   
358 with four classes) for both the CP1 and CP2 partitions, and GTR+FO+I+G4  
359 (same as above but with the inclusion of an invariable sites class) for the CP3  
360 partition. We used IQ-TREE to run the partition model with the models indicated  
361 by PartitionFinder. The trees inferred by the partition model can be found in  
362 Figure 6.

363 We labelled the four classes inferred by the GHOST model in order of  
364 increasing total tree length (TTL): the ‘Conserved Class’ ( $TTL_{Cons}=0.23$ ), the  
365 ‘Convergent Class’ ( $TTL_{Conv}=0.99$ ), ‘Fast-evolving Class A’ ( $TTL_{FEA}=4.06$ ) and  
366 ‘Fast-evolving Class B’ ( $TTL_{FEB}=4.18$ ). Of particular interest is the Convergent

367 Class, so named as it corresponds well to Zakon *et al.*'s (2006) hypothesis of  
368 convergent evolution of  $Na_v1.4a$  among the South American and African electric  
369 fish clades. The convergent class tree displays much more evolution in the electric  
370 rather than the non-electric fish lineages (Fig. 7). This is indicative of either a  
371 relaxation of purifying selection pressure, an introduction of positive selection  
372 pressure or a combination of both. The notable exception is the Brown Ghost  
373 Knifefish, which appears relatively conserved. The Brown Ghost Knifefish is unique  
374 amongst the other electric fish in the dataset, in that its electric organ has evolved  
375 from neural rather than muscle tissue. Consequently in the Brown Ghost Knifefish  
376 the  $Na_v1.4a$  gene is still expressed in muscle, just as it is in the non-electric fish.  
377 The clear distinction in terminal edge length between the Brown Ghost Knifefish  
378 and the other electric fishes is obvious and compelling. It provides strong evidence  
379 that the GHOST model has indeed identified a subtle component of the historical  
380 signal related to the convergent evolution of  $Na_v1.4a$ , as opposed to returning an  
381 arbitrary combination of numerical parameters that happen to maximize the  
382 likelihood function. The ability of the GHOST model to isolate such a small  
383 component of the signal (the inferred weight of the convergent class being 0.13, the  
384 smallest of the 4 classes) is most encouraging. Furthermore, we can expect that the  
385 sites belonging with high probability to the convergent class are likely to have been

386 influential in the functional development of the electric organ.

387 *Soft classification of sites to classes.*— The soft classification of sites to classes  
388 facilitates the prospective identification of functionally important sites in an  
389 alignment. Zakon et al. (2006) report several amino acid sites from the dataset that  
390 are influential in the inactivation of the sodium channel, a process critical to  
391 electric organ pulse duration. Figure 8a shows that these sites generally have a  
392 higher than average probability of belonging to the convergent class in at least one  
393 codon position. For example, at amino acid site 647 an otherwise conserved proline  
394 (codon CCN) is replaced by a valine (GTN) in the Pintailed Knifefish and a  
395 cysteine (TGY) in the Electric Eel. Unique substitutions at codon positions 1 and 2  
396 are necessary for both of these amino acid replacements and we find these two sites  
397 have a very high probability of belonging to the convergent class. With this result  
398 in mind, for each amino acid we summed the probability of codon positions 1 and 2  
399 belonging to the Convergent Class. Figure 8b shows the results for the eight amino  
400 acid sites with the highest score. Comparing the magnitude of these bars with those  
401 of the amino acids in Figure 8a (which are known to be functionally important),  
402 one can suspect that these amino acids might also be critical to the operation of  
403 the sodium channel gene. Given that there are many other sites in the alignment  
404 with a high probability of belonging to the convergent class, one can envisage the

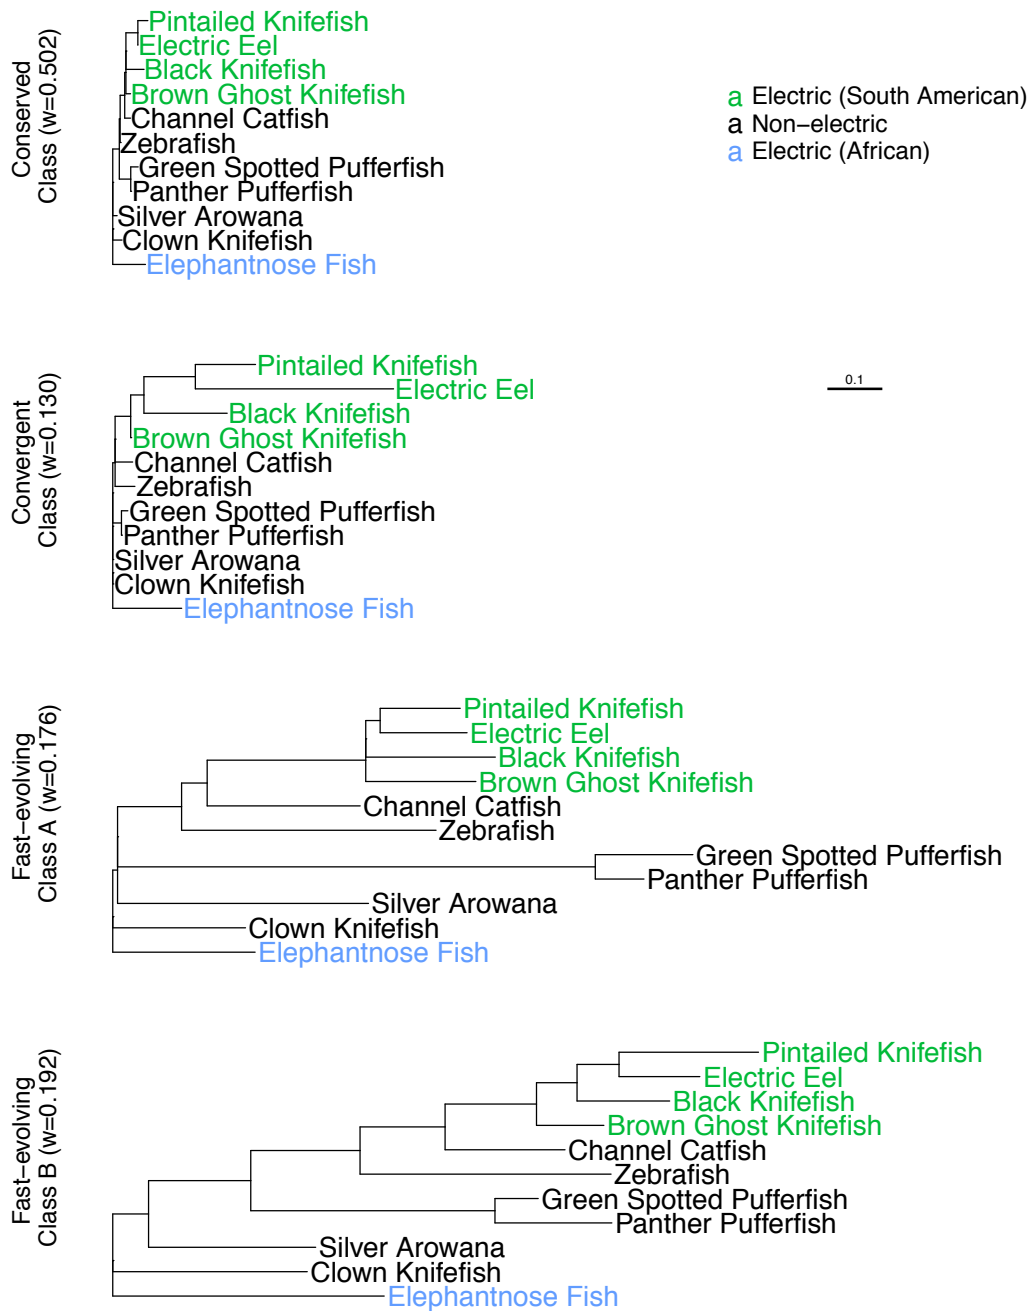

Figure 5: The four trees inferred under the General Time Reversible, four class mixture model (GTR+FO\*H4) for the electric fish data. We can clearly see the variability of the branch lengths among the four classes. The classes are displayed in order of increasing tree size, as determined by the sum of the branch lengths. We refer to this as the total tree length (TTL):  $TTL_{Cons} = 0.23$ ,  $TTL_{Conv} = 0.99$ ,  $TTL_{FEA} = 4.06$  and  $TTL_{FEB} = 4.18$ .

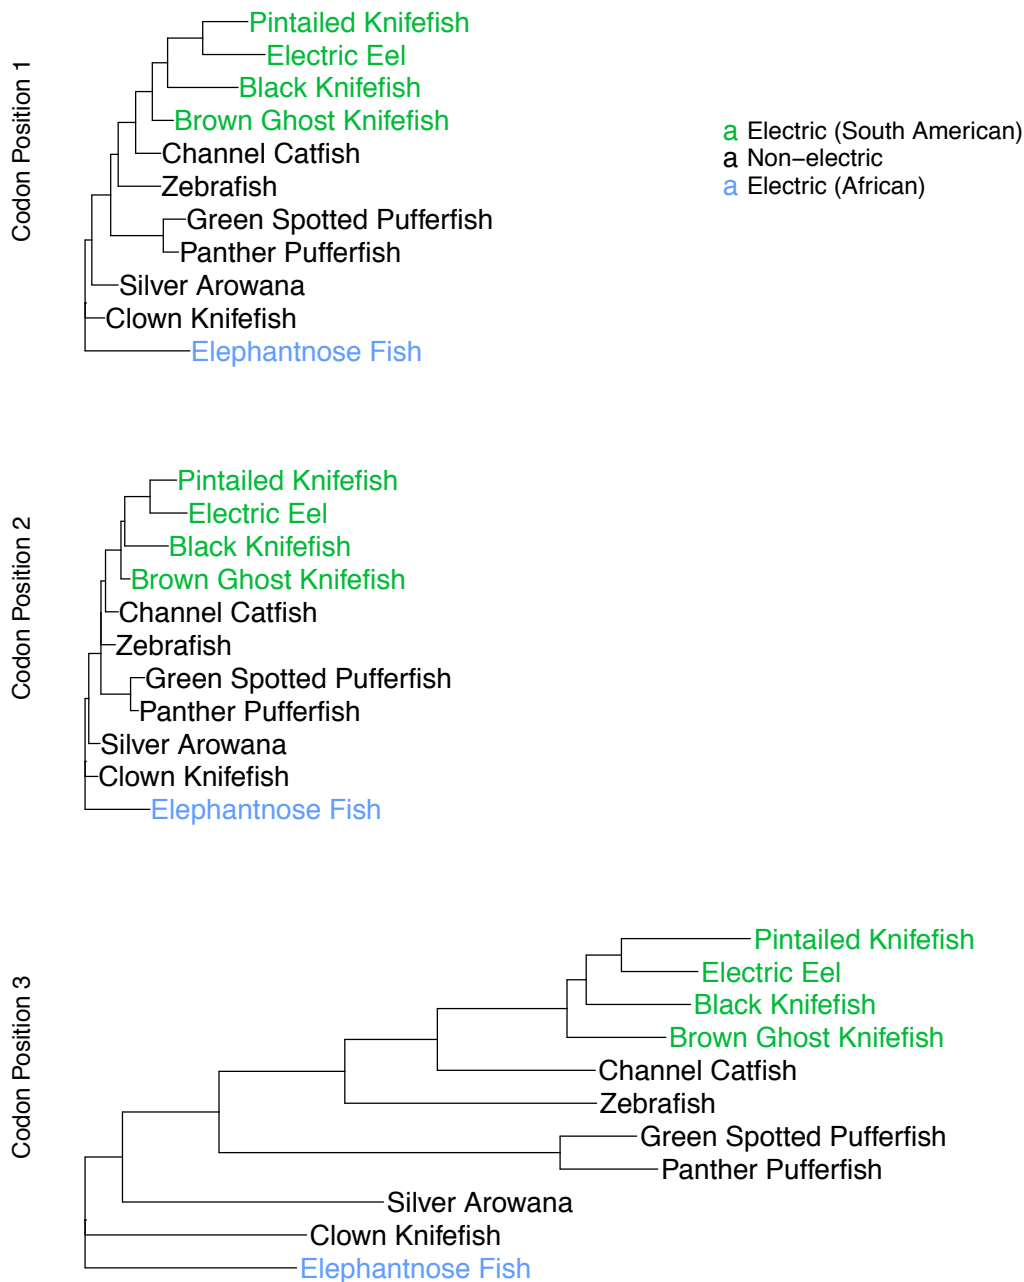

Figure 6: The three trees inferred under the edge-unlinked partition model for the electric fish dataset, with the alignment partitioned based on codon position (CP). The CP1 and CP2 partitions used a GTR+FO+G model, while the CP3 partition used a GTR+FO+I+G model.

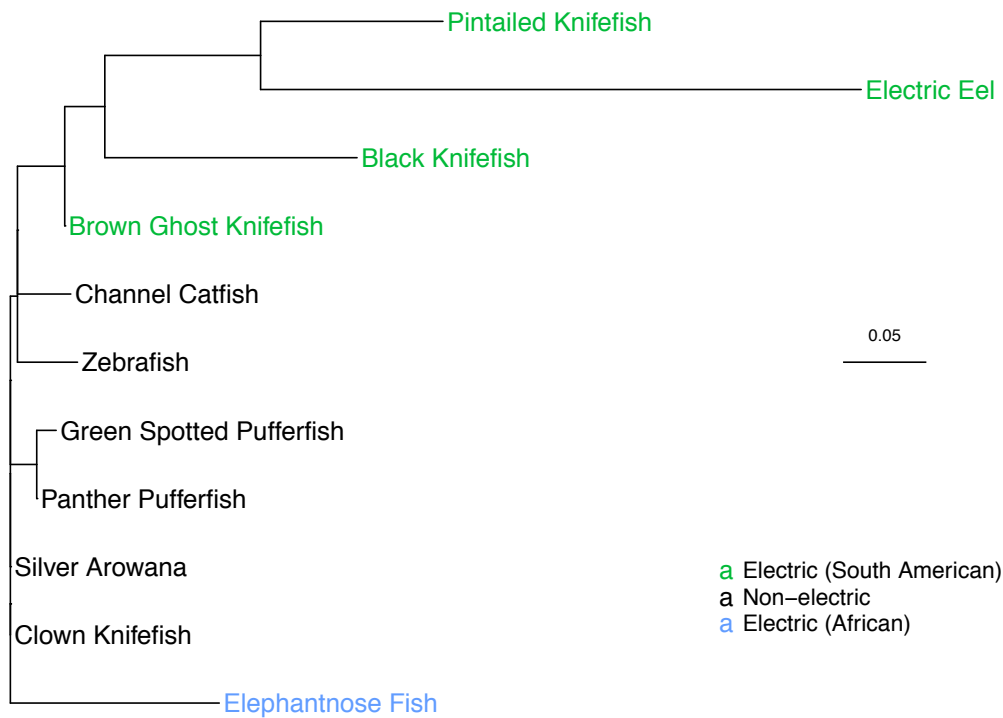

Figure 7: The convergent class inferred by ML-GTR+FO\*H4. The 11 fish species comprised four South American electric fish (green), one African electric fish (blue), and six non-electric fish (black) from various locations. The tree for this class shows that in comparison to the electric fish, the non-electric species are relatively conserved.

405 GHOST model helping to identify sites of potential functional importance in an  
406 alignment, thereby focusing the experimental work of biologists.

407 In addition to providing insight on an individual site basis, the soft  
408 classification can also help to inform us about the nature of the classes themselves.  
409 Summing the weighted TTLs for each of the inferred classes results in an estimated  
410 1.766 substitutions per site under the inferred model. Table 1 reports the  
411 contributions to this figure, stratified by codon position and class. If class  
412 membership and codon position were independent attributes of each site then we  
413 should expect the contribution of each codon position to be approximately one  
414 third for each class. This is not what we observe. Overall we can see that sites in  
415 CP1(23%) and CP2 (16%) contribute only 39% of the total of 1.766 substitutions  
416 per site. However, within the Conserved and Convergent Classes, sites in CP1 and  
417 CP2 are responsible for 90% and 76% of their contribution respectively. This would  
418 suggest that a comparatively larger proportion of the substitutions attributed to  
419 these classes are non-synonymous: resulting in amino acid replacements that  
420 influence the fitness of the organism. We can therefore conclude that even though  
421 the Conserved and Convergent Classes are smallest (as determined by substitutions  
422 per site), they appear to be the primary catalyst of evolution via natural selection  
423 within *Na<sub>v</sub>1.4a* amongst these species.



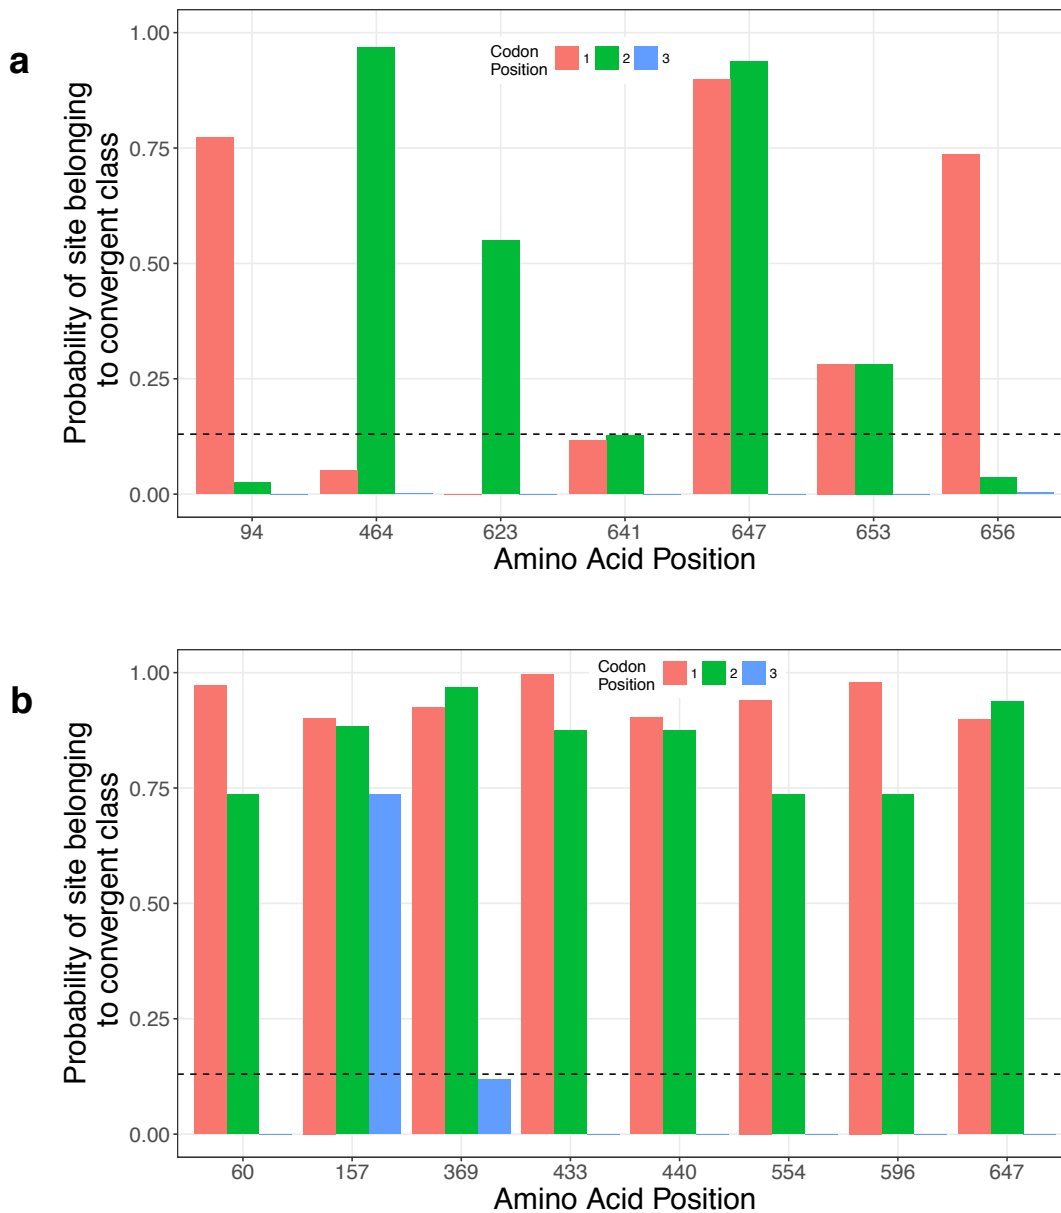

Figure 8: Probability of sites belonging to the convergent class by codon position. (a) The amino acid positions selected correspond with those identified by Zakon et al. (2006) as being functionally important to the inactivation of the  $\text{Na}^+$  gene. The horizontal dotted line at 0.13 represents the average probability of belonging to the convergent class over all sites in the alignment. (b) The amino acid positions selected correspond to those with the highest probability of belonging to the convergent class, summed across the first two codon positions.

| Class           | CP1         | CP2         | CP3         | Subs/site    |
|-----------------|-------------|-------------|-------------|--------------|
| Conserved       | 0.049 (41%) | 0.058 (49%) | 0.012 (10%) | <b>0.119</b> |
| Convergent      | 0.051 (40%) | 0.047 (36%) | 0.031 (24%) | <b>0.129</b> |
| Fast-evolving A | 0.135 (19%) | 0.076 (11%) | 0.504 (70%) | <b>0.715</b> |
| Fast-evolving B | 0.175 (22%) | 0.100 (12%) | 0.528 (66%) | <b>0.803</b> |
| All Classes     | 0.410 (23%) | 0.280 (16%) | 1.076 (61%) | <b>1.766</b> |

Table 1: Expected number of substitutions per site (bold), weighted by class and separated by codon position (CP). For each inferred class, the expected substitutions per site are calculated by multiplying the total tree length (TTL) by the class weight. The CP1, CP2 and CP3 columns show the contribution to these figures from only the sites within each CP. The grand total indicates that under the parameters inferred by ML-GTR+H4 we would expect 1.766 nucleotide substitutions per site. We can then see, for example, that the Convergent Class is responsible for 0.129 of these substitutions per site. Finally, of the 0.129 substitutions per site attributable to the Convergent Class, 0.051 (or 40%) is the contribution from sites in CP1, 0.047 (36%) is the contribution from sites in CP2 and 0.031 (24%) is the contribution from sites in CP3.

424 *Comparison to the Partition Model.*— It is apparent upon examination of the trees  
425 in Figure 6 that the evidence of convergent evolution highlighted by the GHOST  
426 model (Fig. 7) has not been recovered by the partition model. None of the three  
427 trees in Figure 6 have the distinctive pattern, whereby the majority of the total  
428 tree length is associated with the electric fish species (with the exception of the  
429 Brown Ghost Knifefish). The reason that the partition model failed to recover this  
430 signal is clear when considering the contribution of each CP to the Convergent  
431 Class. Table 1 indicates that the substitutions associated with the Convergent  
432 Class are attributable to CP1 sites (40%), CP2 sites (36%) and CP3 sites (24%).  
433 The partition model constrains the analysis, such that sites in different CPs are  
434 modeled independent of each other. It is impossible for a model constrained in such  
435 a way to recover the convergent evolution signal, or any other signal whose  
436 components are distributed across multiple partitions. The decision to partition the  
437 data based on codon position may make sense superficially, but in doing so the  
438 analysis is constrained and the results are compromised. We no longer have the  
439 ability to uncover the evolutionary stories concealed within the data. We can only  
440 hope to obtain those stories that happen not to conflict with the assumptions and  
441 constraints that have been placed on the analysis *a priori*. Minimizing these  
442 assumptions and constraints where possible, while computationally expensive, is

443 necessary in order to illuminate the evolutionary history without distorting it in  
444 the process.

445 *On the Identifiability of the GHOST Model*

446 An ongoing concern with regard to parameter-rich mixture models has been  
447 whether or not they are identifiable. There are several examples of theoretically  
448 non-identifiable mixture models in the literature (Matsen and Steel, 2007;  
449 Štefankovič and Vigoda, 2007b). These examples have inspired much theoretical  
450 work on the identifiability or otherwise of different types of phylogenetic mixture  
451 models (Allman and Rhodes, 2006; Štefankovič and Vigoda, 2007a; Allman et al.,  
452 2008; Allman and Rhodes, 2008; Allman et al., 2011). Of particular interest to the  
453 current study, Allman et al. (2011) showed that for a single topology, four taxa,  
454 two-class mixture under the JC model, only the tree topology is identifiable but not  
455 the branch lengths. This provides a theoretical justification for the procedure  
456 carried out by K&T (and replicated here), measuring performance of the models  
457 based only on recovery of the topology and paying no attention to recovery of  
458 branch length parameters. With regard to the identifiability of the GHOST model  
459 more generally, we rely on a result from Rhodes and Sullivant (2012). They  
460 established an upper bound on the number of classes for which tree topology,

461 branch lengths and model parameters are identifiable, as a function of the number  
462 of character states and the number of taxa. For the simulations we carry out in the  
463 current study, with 12 taxa and four character states, the model is identifiable up  
464 to a maximum of 15 classes. In the case of the electric fish dataset, with four  
465 character states and only 11 taxa, the model is identifiable up to 11 classes.  
466 However, there is a technical caveat. The result is shown based on assuming a  
467 general Markov model across the tree. There are specific choices of parameters that  
468 can result in non-identifiability, but these are of little concern in practical data  
469 analysis. Problems arise only when the parameters selected collapse the parameter  
470 space to some lower dimension. For example, we could fit the GTR model but if we  
471 chose parameters such that all base frequencies were equal and all substitution  
472 rates were equal then we are in fact using a JC model, and identifiability may be  
473 compromised. However, these technical examples of non-identifiability are not  
474 relevant in practice, as in the absence of any constraints there is no likelihood of  
475 inferring parameters that collapse the parameter space in such a way.

## 476 CONCLUSION

477 Heterotachy has been somewhat of an Achilles heel for ML since K&T published  
478 their study. The implementation of the GHOST model in IQ-TREE represents a

479 positive advance for ML based phylogenetic inference. Through minimization of  
480 model assumptions the GHOST model offers significant flexibility to infer  
481 heterotachous evolutionary processes, illuminating historical signals that might  
482 otherwise remain hidden. The GHOST model seems well suited to the analysis of  
483 phylogenomic datasets, commonly used to address deep phylogenetic questions.  
484 While we only present the method and one single-gene empirical example in the  
485 current paper, forthcoming empirical studies will compare the performance of the  
486 GHOST model to currently popular phylogenomic analysis tools, such as partition  
487 and CAT models. One can also envisage many other potential uses for the GHOST  
488 model. It could be applied to datasets for which the topology is poorly supported  
489 or disputed. It could also provide more accurate parameter estimates, leading to  
490 sounder divergence date estimation. The model provides intuitive, biologically  
491 meaningful visualizations of the different evolutionary pressures that act on a group  
492 of taxa. Structural biologists may find it useful for highlighting functionally  
493 important areas within proteins. We have demonstrated its use as a method for  
494 identifying changes in selection pressure, as well as bringing to light evidence of  
495 convergent evolution. Similarly, one can envisage the GHOST model illuminating  
496 the subtle evolutionary relationships between hosts and parasites, disease and  
497 immune cells, or the countless evolutionary arms races that are observed

498 throughout the natural world.

499

## *ACKNOWLEDGEMENTS*

500 The authors would like to thank Elizabeth Allman and John Rhodes for helpful  
501 discussion about the manuscript.

502 B.Q.M. and A.v.H were supported by the Austrian Science Fund (FWF  
503 I-2805-B29).

504 *COMPETING FINANCIAL INTERESTS.*— The authors declare no competing  
505 financial interests.



## REFERENCES

506

507 Akaike, H. (1974). A new look at the statistical model identification. *IEEE*  
508 *Transactions on Automatic Control*, 19(6):716–723.

509 Allman, E. S., Ané, C., and Rhodes, J. A. (2008). Identifiability of a Markovian  
510 model of molecular evolution with gamma-distributed rates. *Advances in*  
511 *Applied Probability*, pages 229–249.

512 Allman, E. S., Petrovic, S., Rhodes, J. A., and Sullivant, S. (2011). Identifiability  
513 of two-tree mixtures for group-based models. *IEEE/ACM Transactions on*  
514 *Computational Biology and Bioinformatics (TCBB)*, 8(3):710–722.

515 Allman, E. S. and Rhodes, J. A. (2006). The identifiability of tree topology for  
516 phylogenetic models, including covarion and mixture models. *Journal of*  
517 *Computational Biology*, 13(5):1101–1113.

518 Allman, E. S. and Rhodes, J. A. (2008). Identifying evolutionary trees and  
519 substitution parameters for the general Markov model with invariable sites.  
520 *Mathematical Biosciences*, 211(1):18–33.

521 Baele, G., Raes, J., Van de Peer, Y., and Vansteelandt, S. (2006). An improved  
522 statistical method for detecting heterotachy in nucleotide sequences. *Molecular*  
523 *Biology and Evolution*, 23(7):1397–1405.

- 524 Dempster, A. P., Laird, N. M., and Rubin, D. B. (1977). Maximum likelihood from  
525 incomplete data via the EM algorithm. *Journal of the Royal Statistical*  
526 *Society, Series B*, pages 1–38.
- 527 Felsenstein, J. (1978). Cases in which parsimony or compatibility methods will be  
528 positively misleading. *Systematic Biology*, 27(4):401–410.
- 529 Felsenstein, J. (1981). Evolutionary trees from DNA sequences: a maximum  
530 likelihood approach. *Journal of Molecular Evolution*, 17(6):368–376.
- 531 Fitch, W. M. and Margoliash, E. (1967). A method for estimating the number of  
532 invariant amino acid coding positions in a gene using cytochrome *c* as a model  
533 case. *Biochemical Genetics*, 1(1):65–71.
- 534 Gadagkar, S. R. and Kumar, S. (2005). Maximum likelihood outperforms  
535 maximum parsimony even when evolutionary rates are heterotachous.  
536 *Molecular Biology and Evolution*, 22(11):2139–2141.
- 537 Holmquist, R., Goodman, M., Conroy, T., and Czelusniak, J. (1983). The spatial  
538 distribution of fixed mutations within genes coding for proteins. *Journal of*  
539 *Molecular Evolution*, 19(6):437–448.
- 540 Jayaswal, V., Wong, T. K., Robinson, J., Poladian, L., and Jermin, L. S. (2014).  
541 Mixture models of nucleotide sequence evolution that account for

- 542 heterogeneity in the substitution process across sites and across lineages.  
543 *Systematic Biology*, 63(5):726–742.
- 544 Jukes, T. and Cantor, C. (1969). Evolution of protein molecules. In Munro H.N.  
545 *Mammalian Protein Metabolism*, pages 21–123, New York: Academic Press.
- 546 Kalyaanamoorthy, S., Minh, B. Q., Wong, T. K., von Haeseler, A., and Jermini,  
547 L. S. (2017). Modelfinder: fast model selection for accurate phylogenetic  
548 estimates. *Nature Methods*, 14(6):587–589.
- 549 Kolaczkowski, B. and Thornton, J. W. (2004). Performance of maximum  
550 parsimony and likelihood phylogenetics when evolution is heterogeneous.  
551 *Nature*, 431(7011):980–984.
- 552 Kuhner, M. K. and Felsenstein, J. (1994). A simulation comparison of phylogeny  
553 algorithms under equal and unequal evolutionary rates. *Molecular Biology and*  
554 *Evolution*, 11(3):459–468.
- 555 Lanfear, R., Calcott, B., Ho, S. Y., and Guindon, S. (2012). PartitionFinder:  
556 combined selection of partitioning schemes and substitution models for  
557 phylogenetic analyses. *Molecular Biology and Evolution*, 29(6):1695–1701.
- 558 Lartillot, N. and Philippe, H. (2004). A Bayesian mixture model for across-site

- 559 heterogeneities in the amino-acid replacement process. *Molecular Biology and*  
560 *Evolution*, 21(6):1095–1109.
- 561 Lopez, P., Casane, D., and Philippe, H. (2002). Heterotachy, an important process  
562 of protein evolution. *Molecular Biology and Evolution*, 19(1):1–7.
- 563 Matsen, F. A. and Steel, M. (2007). Phylogenetic mixtures on a single tree can  
564 mimic a tree of another topology. *Systematic Biology*, 56(5):767–775.
- 565 Meade, A. and Pagel, M. (2008). A phylogenetic mixture model for heterotachy. In  
566 *Evolutionary Biology from Concept to Application*, pages 29–41. Springer.
- 567 Nguyen, L.-T., Schmidt, H. A., von Haeseler, A., and Minh, B. Q. (2015).  
568 IQ-TREE: a fast and effective stochastic algorithm for estimating  
569 maximum-likelihood phylogenies. *Molecular Biology and Evolution*,  
570 32(1):268–274.
- 571 Pagel, M. and Meade, A. (2004). A phylogenetic mixture model for detecting  
572 pattern-heterogeneity in gene sequence or character-state data. *Systematic*  
573 *Biology*, 53(4):571–581.
- 574 Pagel, M. and Meade, A. (2005). Mixture models in phylogenetic inference.  
575 *Mathematics of Evolution and Phylogeny*, pages 121–142.

- 576 Philippe, H. and Lopez, P. (2001). On the conservation of protein sequences in  
577 evolution. *Trends in Biochemical Sciences*, 26(7):414–416.
- 578 Philippe, H., Zhou, Y., Brinkmann, H., Rodrigue, N., and Delsuc, F. (2005).  
579 Heterotachy and long-branch attraction in phylogenetics. *BMC Evolutionary*  
580 *Biology*, 5(1):50.
- 581 Rambaut, A. and Grassly, N. C. (1997). Seq-Gen: an application for the Monte  
582 Carlo simulation of DNA sequence evolution along phylogenetic trees.  
583 *Computer Applications in the Biosciences: CABIOS*, 13(3):235–238.
- 584 Rhodes, J. A. and Sullivant, S. (2012). Identifiability of large phylogenetic mixture  
585 models. *Bulletin of Mathematical Biology*, 74(1):212–231.
- 586 Spencer, M., Susko, E., and Roger, A. J. (2005). Likelihood, parsimony, and  
587 heterogeneous evolution. *Molecular Biology and Evolution*, 22(5):1161–1164.
- 588 Steel, M. (2005). Should phylogenetic models be trying to fit an elephant? *Trends*  
589 *in Genetics*, 21(6):307–309.
- 590 Štefankovič, D. and Vigoda, E. (2007a). Phylogeny of mixture models: Robustness  
591 of maximum likelihood and non-identifiable distributions. *Journal of*  
592 *Computational Biology*, 14(2):156–189.

- 593 Štefankovič, D. and Vigoda, E. (2007b). Pitfalls of heterogeneous processes for  
594 phylogenetic reconstruction. *Systematic Biology*, 56(1):113–124.
- 595 Wang, H.-C., Li, K., Susko, E., and Roger, A. J. (2008). A class frequency mixture  
596 model that adjusts for site-specific amino acid frequencies and improves  
597 inference of protein phylogeny. *BMC Evolutionary Biology*, 8(1):331.
- 598 Whelan, N. V. and Halanych, K. M. (2017). Who let the CAT out of the bag?  
599 Accurately dealing with substitutional heterogeneity in phylogenomic analyses.  
600 *Systematic Biology*, 66(2):232–255.
- 601 Wu, J. and Susko, E. (2009). General heterotachy and distance method  
602 adjustments. *Molecular Biology and Evolution*, 26(12):2689–2697.
- 603 Wu, J. and Susko, E. (2011). A test for heterotachy using multiple pairs of  
604 sequences. *Molecular Biology and Evolution*, 28(5):1661–1673.
- 605 Yang, Z. (1994). Maximum likelihood phylogenetic estimation from DNA sequences  
606 with variable rates over sites: approximate methods. *Journal of Molecular*  
607 *Evolution*, 39(3):306–314.
- 608 Zakon, H. H., Lu, Y., Zwickl, D. J., and Hillis, D. M. (2006). Sodium channel genes  
609 and the evolution of diversity in communication signals of electric fishes:

610 convergent molecular evolution. *Proceedings of the National Academy of*  
611 *Sciences of the United States of America*, 103(10):3675–3680.
